# Supplementary material for: Molecular dynamics simulation of the diffusion behavior of water in poly(vinylidene fluoride)/silica hybrid membranes
Source: Royal Society of Chemistry journal article supplement (doi:10.1039/c5ra09261b), 2015-01-01
Supplement: c5ra09261b1.pdf [file c5ra09261b1.pdf]

### Computed error

Table 1. FFV (the fractional free volume) of PVDF Control Membrane and PVDF/SiO<sub>2</sub> Hybrid Membranes of Class I.

| Radius of the probe (Å)  | 0            | 0.5          | 1.0         | 1.4         | 1.9         |
|--------------------------|--------------|--------------|-------------|-------------|-------------|
| PVDF                     | 24.09(0.022) | 14.79(0.029) | 3.83(0.020) | 0.82(0.020) | 0.08(0.015) |
| PVDF1SiO <sub>2</sub> -1 | 24.15(0.018) | 14.79(0.020) | 3.57(0.027) | 0.64(0.024) | 0.03(0.008) |
| PVDF2SiO <sub>2</sub> -1 | 24.26(0.022) | 15.18(0.017) | 4.00(0.023) | 0.88(0.021) | 0.09(0.006) |
| PVDF4SiO <sub>2</sub> -1 | 24.45(0.026) | 15.49(0.019) | 4.18(0.018) | 0.93(0.018) | 0.07(0.005) |

\* The average deviations are putted in the brackets, which are achieved from last ten balanced configuration.

Table 2. Diffusion Coefficients of Water in PVDF control Membrane and PVDF/SiO<sub>2</sub> Hybrid Membranes of Class I.

| Membranes                | Diffusion Coefficient |
|--------------------------|-----------------------|
| PVDF                     | 1.80(0.9921)          |
| PVDF1SiO <sub>2</sub> -1 | 2.77(0.9957)          |
| PVDF2SiO <sub>2</sub> -1 | 2.67(0.9746)          |
| PVDF4SiO <sub>2</sub> -1 | 3.73(0.9866)          |

\* The correlation coefficient squares are putted in the bracketeds.

Table 3. FFV of PVDF Control Membrane and PVDF/SiO<sub>2</sub> Hybrid Membranes of Class II.

| Radius of the probe (Å)  | 0            | 0.5          | 1.0         | 1.4         | 1.9         |
|--------------------------|--------------|--------------|-------------|-------------|-------------|
| PVDF                     | 24.09(0.022) | 14.79(0.029) | 3.83(0.020) | 0.82(0.020) | 0.08(0.015) |
| PVDF4SiO <sub>2</sub> -1 | 24.45(0.026) | 15.49(0.019) | 4.18(0.019) | 0.93(0.018) | 0.07(0.005) |
| PVDF2SiO <sub>2</sub> -2 | 24.56(0.013) | 15.59(0.027) | 4.33(0.030) | 0.97(0.013) | 0.10(0.009) |
| PVDF1SiO <sub>2</sub> -4 | 24.56(0.033) | 15.68(0.027) | 4.44(0.015) | 1.12(0.029) | 0.16(0.002) |

\* The average deviations are putted in the brackets, which are achieved from the last ten balanced configuration.

Table 4. Diffusion Coefficients of Water in PVDF Control Membrane and PVDF/SiO<sub>2</sub> Hybrid Membranes of Class II.

| Membranes                | Diffusion Coefficient |
|--------------------------|-----------------------|
| PVDF                     | 1.80(0.9921)          |
| PVDF4SiO <sub>2</sub> -1 | 3.73(0.9866)          |
| PVDF2SiO <sub>2</sub> -2 | 4.50(0.9954)          |
| PVDF1SiO <sub>2</sub> -4 | 2.23(0.9299)          |

\* The correlation coefficient squares are putted in the brackets.
